# Supplementary material for: Non-sticky SiNx nanonets for single protein denaturation analysis
Source: Royal Society of Chemistry journal article supplement (doi:10.1039/d4fd00117f), 2024-06-07
Supplement: d4fd00117f1.pdf [file d4fd00117f1.pdf]

## Supplementary Material

### Non-sticky SiN<sub>x</sub> nanonets for single protein denaturation analysis

Yuanhao Wang<sup>a</sup>, Nan An<sup>a</sup>, Bintong Huang<sup>a,b\*</sup>, and Yueming Zhai<sup>a\*</sup>

<sup>a</sup> *The Institute for Advanced Studies (IAS), Wuhan University, Wuhan, 430072, P. R. China.*

<sup>b</sup> *School of Physics and Technology, Wuhan University, Wuhan 430072, Hubei, China.*

Email: bthuang@whu.edu.cn; yueming@whu.edu.cn

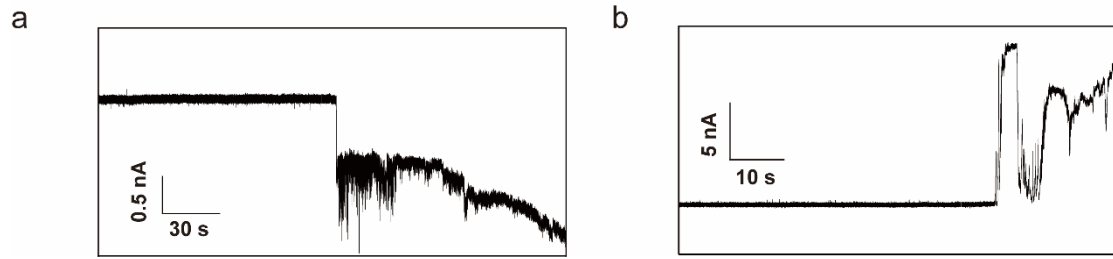

Figure S1. Typical current blocking signals of ovalbumin detected by SiNx nanonets at 100 mV (a), -100 mV (b).

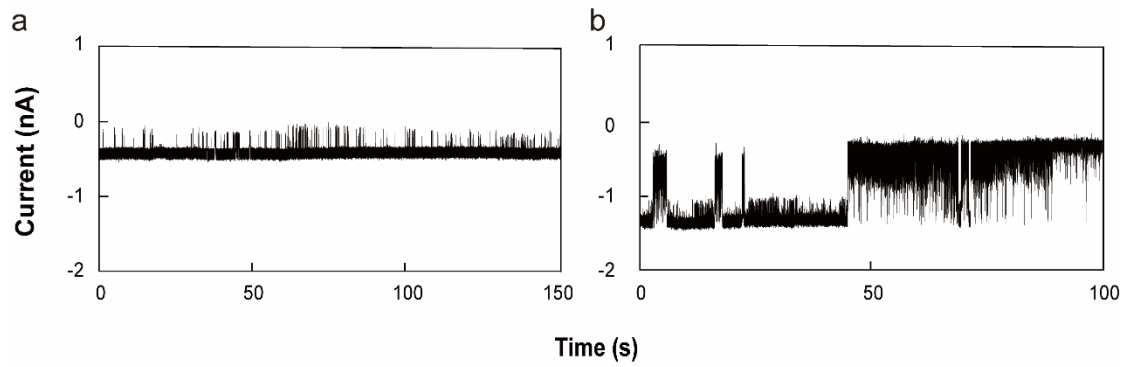

Figure S2. Typical current signals of ovalbumin detected by PEG-coated SiNx nanonets at -50 mV (a) and -150mV (b).

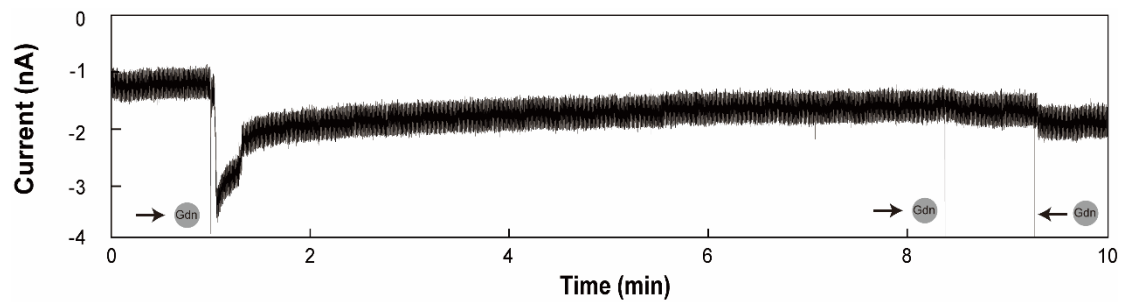

Figure S3. The current records of Gdn-HCl without proteins.

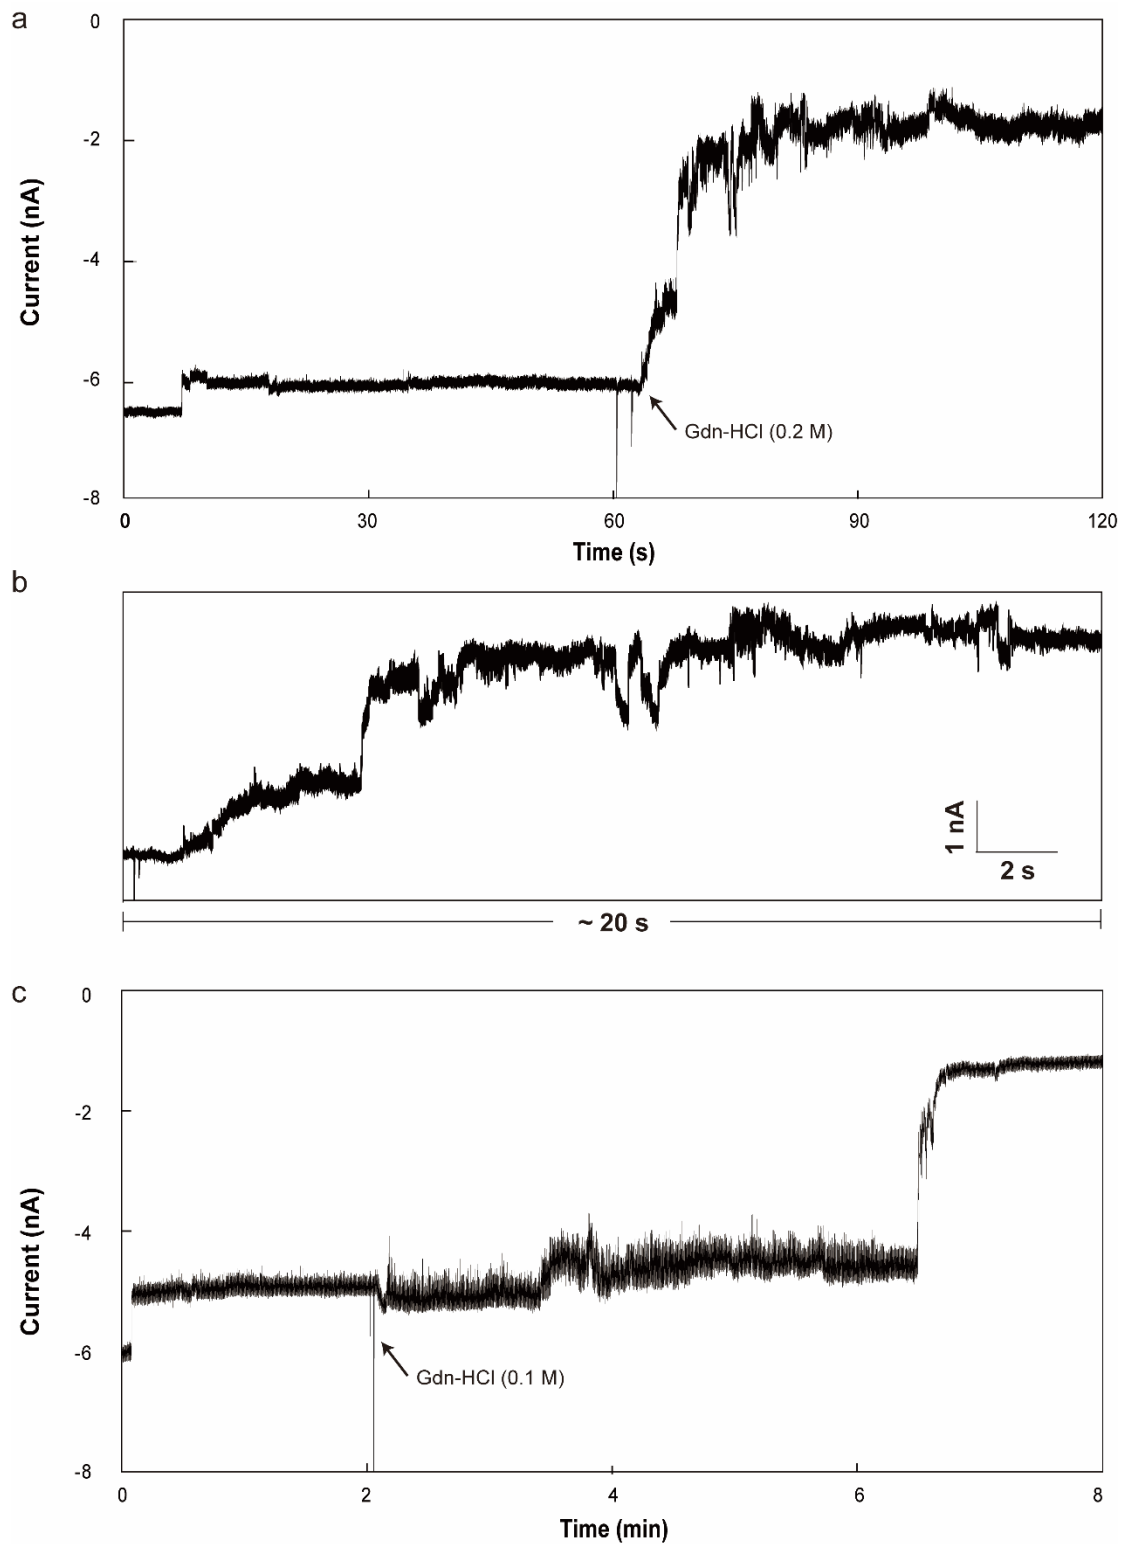

Figure S4. Current records of ovalbumin capture by electroosmotic flow and subsequent changes of ionic current with time in the presence of 0.2 M Gdn-HCl (a), 0.1 M Gdn-HCl (c). The data was collected at -200 mV (a) and -100 mV (c), respectively. (b) a detailed enlarged view of the denaturation phase in (a).

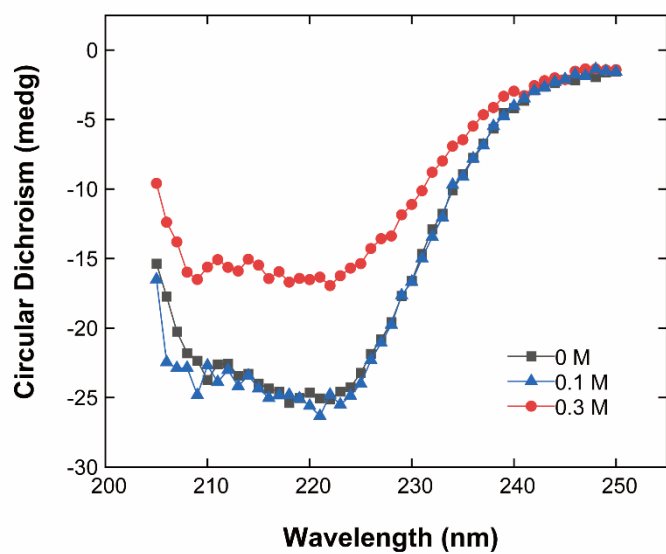

Figure S5. Effect of Gdn-HCl on the CD spectrum of ovalbumin. Leave for 12 h after adding denaturant.
